# Supplementary material for: Overview of post-discharge predictors for psychiatric re-hospitalisations: a systematic review of the literature
Source: Springer Nature journal article supplement (doi:10.1186/s12888-017-1386-z), 2017-06-24
Supplement: MOESM2 [file 12468876]

## Additional file 2: Evaluation table

| Author and year      | Country      | Study population                                                                                                                                  | Diagnosis category | Study design                             | Aim of the study                                                                                                                                                                                                                           | Recruitment interval | Follow-up interval     | PD factor investigated                                                                                                                                                                                                                                                                                                                                | Factor is significant (univariate OR multivariate) |
|----------------------|--------------|---------------------------------------------------------------------------------------------------------------------------------------------------|--------------------|------------------------------------------|--------------------------------------------------------------------------------------------------------------------------------------------------------------------------------------------------------------------------------------------|----------------------|------------------------|-------------------------------------------------------------------------------------------------------------------------------------------------------------------------------------------------------------------------------------------------------------------------------------------------------------------------------------------------------|----------------------------------------------------|
| Barker et al. 1999   | USA          | 68 patients admitted to the mental health unit during a 30-day period                                                                             | F3                 | Prospective cohort                       | To evaluate whether hospital readmission rates of patients with depression decreased as a result of psychiatric nurse home visits.                                                                                                         | 30 days              | 60 days                | Psychiatric nurse home follow-up : The nurse came to the patients home to deliver mental health interventions (assessment of stressors, assessment of coping mechanisms and teaching new effective coping skills, teaching about the therapeutic regimen, and reinforcing compliance) and to provide close follow-up; three times a week for 9 weeks. | Yes                                                |
| Becker et al. 2007   | USA          | Voluntary admitted adult patients with schizophrenia, with LOS between 1 and 365                                                                  | F2                 | Prospective cohort LADB                  | To investigate voluntary readmission and possible risk factors                                                                                                                                                                             | 10 years             | 5 years                | Follow-up within 30 days                                                                                                                                                                                                                                                                                                                              | Yes                                                |
| Ben-Arie et al. 1990 | South Africa | Patients with illness severe enough to warrant admission to the general wards of a large psychiatric hospital in Cape Town (Valkenberg Hospital). | No limitation      | Case control                             | To assess whether and in what way research procedures may have affected outcome in a large study designed to assess the course of major psychiatric disorder in a cohort of patients.                                                      | 8 1/2 months         | 2 years                | Being part of a research program: Experimental group patients were intensively assessed on index admission by way of interviews with patients and relatives, and 4 six monthly home visits by psychiatric nurses.                                                                                                                                     | Yes                                                |
| Bernet 2013          | USA          | Veterans at High Risk of Suicide (N=124)                                                                                                          | No limitation      | Prospective cohort LADB,                 | To determine a relationship between the number of mental health contacts in the thirty days after discharge, and the likelihood of psychiatric readmission in the 12 months after the initial hospitalization for a psychiatric diagnosis. | 17 months            | 12 months              | Follow-up within 30 days                                                                                                                                                                                                                                                                                                                              | Yes                                                |
| Boden et al. 2011    | Sweden       | Patients with a first hospitalization for schizophrenia or schizoaffective disorder between                                                       | F2                 | Prospective cohort, Record linkage study | To identify risk factors for re-hospitalization of patients with recent onset schizophrenia or schizoaffective disorder in a                                                                                                               | 1 year               | Variable (max 2 years) | Early post-discharge non-adherence to antipsychotics : not having filled a prescription of antipsychotic medication within the first week after discharge from the index hospitalization                                                                                                                                                              | Yes                                                |

|                      |           |                                                                                                                                                    |               |                                   |                                                                                                                                                                                        |                      |          |                                                                                                                                                                  |       |
|----------------------|-----------|----------------------------------------------------------------------------------------------------------------------------------------------------|---------------|-----------------------------------|----------------------------------------------------------------------------------------------------------------------------------------------------------------------------------------|----------------------|----------|------------------------------------------------------------------------------------------------------------------------------------------------------------------|-------|
|                      |           | 2006 and 2007 (n = 861)                                                                                                                            |               |                                   | population-based cohort study.                                                                                                                                                         |                      |          |                                                                                                                                                                  |       |
| Browne et al. 2013   | Australia | People with schizophrenia discharged to two types of accommodation. The types of accommodation: own home and for-profit boarding house (N=391).    | F2            | Retrospective cohort LADB,        | To investigate the relationship between the type of housing people with schizophrenia are discharged to, their re-admission rates and length of stay in hospital, using archival data  | 3 years and 6 months | NA       | Type of housing : persons own home versus for-profit boarding house                                                                                              | Yes   |
| Burgess et al. 2006  | Australia | All 128,893 discharges from inpatient care                                                                                                         | No limitation | Prospective cohort, LADB          | To test the hypothesis that hospital discharges made subject to CTOs are associated with a reduced risk of readmission.                                                                | 9 years              | Variable | Community treatment orders (CTO) : CTO is defined as = a form of involuntary outpatient treatment (IOP) used principally for conditional discharge from hospital | Yes   |
| Callaly et al. 2010  | Australia | Patients discharged during the 2005-2006 financial year and who have been readmitted within 28 days vs. Patients who were not readmitted           | No limitation | Case control                      | To examine factors that could help identify those most at risk of readmission to an acute psychiatric in-patient unit within 28 days of a discharge.                                   | 1 year               | 28 days  | Days from discharge to community follow-up : first contact with the CMHT following discharge                                                                     | Yes u |
| Callaly et al. 2011  | Australia | Patients discharged from eight Australian adult acute mental health inpatient services (N=475)                                                     | No limitation | Case control                      | To identify risk factors associated with readmission within 28 days of discharge                                                                                                       | 1 year               | 28 days  | Follow up by GP : discharge plan sent to GP                                                                                                                      | Yes   |
| CG et al. 2012       |           | Psychiatric patients discharged from a teaching hospital in Malaysia (N=202)                                                                       | No limitation | Prospective cohort                | To determine the early readmission rate among the psychiatric patients discharged from a teaching hospital in Malaysia and the he associated factors                                   | 8 1/2 months         | 6 months | Compliance to treatment : defined as missing medication as prescribed for 2 consecutive weeks or more                                                            | Yes   |
| Claassen et al. 2005 | USA       | 75,815 patient visits made to a hospital-based psychiatric emergency service for mental health care between January 1, 1995, and December 31, 2002 | No limitation | Natural historic experiment LADB, | This study examined whether implementation of managed care in a public mental health system affected return visits to psychiatric emergency services within 180 days of an index visit | 7 years              | 6 months | Managed care : system intervention                                                                                                                               | Yes   |

|                     |        |                                                                                                                                                                                                                                                        |    |                    |                                                                                                                                                                                                                                                                                                         |           |                      |                                                                                                                                                                                                                                                                                                                                   |     |
|---------------------|--------|--------------------------------------------------------------------------------------------------------------------------------------------------------------------------------------------------------------------------------------------------------|----|--------------------|---------------------------------------------------------------------------------------------------------------------------------------------------------------------------------------------------------------------------------------------------------------------------------------------------------|-----------|----------------------|-----------------------------------------------------------------------------------------------------------------------------------------------------------------------------------------------------------------------------------------------------------------------------------------------------------------------------------|-----|
| Cougnard et al.2006 | France | First-admitted subjects with psychosis (n = 84)                                                                                                                                                                                                        | F2 | Prospective cohort | To explore the pattern of health service utilization over 2 years following a first admission for psychosis and the baseline characteristics predicting readmission                                                                                                                                     | 1-year    | 2 years              | Number of contacts with mental health providers : Medical professionals (Public psychiatrist, Private psychiatrist, Specialist (other than psychiatrist), GP) and Other health professionals (Community psychiatric nurse, Psychologist, Psychotherapist, Psychomotrician) and Mental health professionals (Social worker, other) | No  |
| Craig et al. 2000   | USA    | First-admission patients diagnosed with schizophrenia, bipolar disorder with psychosis, and major depression with psychosis (N=674 at baseline, 603 at 6 month follow-up)                                                                              | F2 | Prospective cohort | Examined clinical correlates of rapid readmission to a psychiatric inpatient service (less than 3 months after discharge) compared to delayed readmissions (3-12 months) in first-admission patients diagnosed with schizophrenia, bipolar disorder with psychosis, and major depression with psychosis | 6 years   | 6 month and 12 month | Locus of care : Defined as locus of follow-up care                                                                                                                                                                                                                                                                                | No  |
| Craig et al. 1995   | USA    | All patients readmitted to a large state psychiatric centre during a 4 month period (Sept.- Dec. 1990), having been discharged from the same hospital less than 90 days prior to readmission.                                                          | F2 | Case control       | To identify clinical and service system characteristics that might differentiate rapidly readmitted psychiatric inpatients from matched samples of patients readmitted after a community tenure of more than 90 days and patients discharged with no readmission within a 6-month period.               | 4 months  | 3 months             | Type of housing : Discharged home, supported community residences or proprietary, nursing, or boarding homes, other                                                                                                                                                                                                               | No  |
| Craig et al. 1997   | USA    | 202 first-admission inpatients with DSM-III-R schizophrenia spectrum (N = 96), psychotic bipolar disorder (N = 64), and psychotic depression (N = 42) 202 first-admission inpatients with DSM-III-R schizophrenia spectrum (N = 96), psychotic bipolar | F2 | Prospective cohort | To investigate the 6-month clinical and psycho-social outcomes for patients diagnosed with a psychotic illness and the association among clinical and psycho-social outcome variables as well as treatment modalities                                                                                   | A 3 years | 6 months             | Continuity of treatment : rated as continuous if the patient reported having regularly participated in some form of treatment during the 6-month follow-up period vs. Brief or no treatment                                                                                                                                       | Yes |

|                          |           |                                                                                                                                                                               |            |                             |                                                                                                                                                                                                                                    |           |                                          |                                                                                                                                                                                                                                                                                                                                                                                                                                                                  |     |
|--------------------------|-----------|-------------------------------------------------------------------------------------------------------------------------------------------------------------------------------|------------|-----------------------------|------------------------------------------------------------------------------------------------------------------------------------------------------------------------------------------------------------------------------------|-----------|------------------------------------------|------------------------------------------------------------------------------------------------------------------------------------------------------------------------------------------------------------------------------------------------------------------------------------------------------------------------------------------------------------------------------------------------------------------------------------------------------------------|-----|
|                          |           | disorder (N = 64), and psychotic depression (N = 42)                                                                                                                          |            |                             |                                                                                                                                                                                                                                    |           |                                          |                                                                                                                                                                                                                                                                                                                                                                                                                                                                  |     |
| Curtis et al. 1992       | USA       | Number of medication (only) visits during the 6-month period (a subset of 4; range = 0-22 medication-only visits).                                                            | F1, F2     | Case control                | To explore in a case-control study whether intensive outreach case management would reduce rates of psychiatric rehospitalisation after an index hospitalization and increase patients use of outpatient ambulatory care services. | 18 months | Different time periods (35 to 52 months) | Case management : Multidisciplinary intensive outreach case management (IOCM) or less intensive community support system (CSS) case management services compared with routine aftercare (RA) but no case management                                                                                                                                                                                                                                              | Yes |
| D'Ercole et al. 1997     | USA       | Inpatients discharged from Harlem Hospital Centre in 1984-1985 (N=189)                                                                                                        | F2         | RCT                         | To assess the effects of case management and patients' characteristics on the use of inpatient psychiatric services.                                                                                                               | 18 months | 12 months                                | Case management: The case management team implemented the discharge treatment plan prescribed for each patient assigned to the case management group and monitored the patient's health problems, psychopathology, family and housing problems, and use of social services.                                                                                                                                                                                      | Yes |
| Dharwadkar 1994          | Australia | 50 patients with the most re-admissions to the Department of Psychiatry over a 12 month period (1989-90) and a primary diagnosis of schizophrenia or major affective disorder | F2, F3     | Natural historic experiment | To outline the effects upon admission rates and time in hospital, after implementation of a Adult Community Team program, for 50 of the most disturbed patients attending our service with a diagnosis of a psychotic disorder.    | 12 months | 1 year after the program                 | Adult community treatment program: The ACT program incorporates a broad spectrum of services to patients who have chronic psychiatric conditions and who are especially prone to relapse. This is achieved by active and co-ordinated case management and intensive psychiatric follow-up. The program offers home-based treatment and support to clients and their families. It facilitates the integration of clients into supportive community based networks | Yes |
| Downing et al. 1999      | UK        | Patients with severe and enduring mental disorders discharged from the hospital psychiatric unit (N=35)                                                                       | F2         | Natural historic experiment | To evaluate CPA (Care Programme Approach)                                                                                                                                                                                          | 3 months  | 6 months                                 | Case management: The Care Programme Approach (CPA): included such features as a keyworker/case manager offering a continuous relationship and coordinated care, assessment and intervention over a range of 'needs', multidisciplinary working in the community, and involvement of user and carer.                                                                                                                                                              | No  |
| Eldon Taylor et al. 2005 | USA       | 60 clients with multiple inpatient admissions                                                                                                                                 | F1, F2, F3 | Natural historic experiment | To formally evaluate the effectiveness of the telephonic targeted care management program.                                                                                                                                         | 12        | 12                                       | Case management: The major difference from traditional case management programs is that the program employed telephonic interventions without a face-to-face component.                                                                                                                                                                                                                                                                                          | Yes |

|                        |              |                                                                                                                                                                                                                |                    |                                          |                                                                                                                                                                                                                   |                    |          |                                                                                                                                                                                                                                                                                        |     |
|------------------------|--------------|----------------------------------------------------------------------------------------------------------------------------------------------------------------------------------------------------------------|--------------------|------------------------------------------|-------------------------------------------------------------------------------------------------------------------------------------------------------------------------------------------------------------------|--------------------|----------|----------------------------------------------------------------------------------------------------------------------------------------------------------------------------------------------------------------------------------------------------------------------------------------|-----|
| Frank et al. 2005      | Canada       | 42 psychotic patients who received compulsory community treatment orders                                                                                                                                       | F0, F1, F2, F3     | Prospective cohort                       | To evaluate the effect of compulsory community treatment orders on subsequent time out of the hospital.                                                                                                           | 2 years            | 2 years  | Community treatment orders (CTO)                                                                                                                                                                                                                                                       | Yes |
| Frazier et al. 1998    | USA          | Consumers who had three or more inpatient admissions to a network hospital in the South-eastern Area during the 18-month index period (N=158)                                                                  | No limitation      | Prospective cohort                       | To assess the effectiveness of TIPS                                                                                                                                                                               | 18 months          | 4 years  | Relapse prevention program : Triggers Intervention and Prevention System (TIPS)                                                                                                                                                                                                        | Yes |
| Frazier et al. 1997    | USA          | 88 consumers who had had more than two hospitalizations of any length within a 12-month period.                                                                                                                | No limitation      | Prospective cohort                       | To assess the effectiveness of TIPS                                                                                                                                                                               | 18 months          | 2 years  | Relapse prevention program : TIPS                                                                                                                                                                                                                                                      | Yes |
| Gillis et al. 1990     | South Africa | All patients admitted to hospital for 3 consecutive months                                                                                                                                                     | No limitation      | Case control                             | To investigate the effectiveness of home visits in reducing readmission rates                                                                                                                                     | 3 months           | 1 year   | Home visits : Not clear by whom                                                                                                                                                                                                                                                        | Yes |
| Goodpastor et al. 1991 | USA          | 207 Patients with frequent re-admissions (three or more times)                                                                                                                                                 | No limitation      | Prospective cohort                       | Studied factors associated with multiple readmissions                                                                                                                                                             | 2 years            | NA       | Compliance to treatment : Non-compliance to medication                                                                                                                                                                                                                                 | Yes |
| Grinshpoon et al. 2011 | Israel       | Patients discharged from the Tirat Carmel psychiatric hospital in Israel (N=908)                                                                                                                               | F0, F2, F3, F4, F6 | Prospective cohort, Record linkage study | To examine a) the association between continuing care and time to rehospitalisation; and b) the predictors of time to first outpatient contact after discharge from psychiatric hospital.                         | 1 year             | 180 days | Visits to OP after index discharge: making or not an outpatient visit within 180 days of key discharge.                                                                                                                                                                                | Yes |
| Hassan et al. 2009     | USA          | Patients age 18-64 years who were discharged from a hospital with a diagnosis of bipolar disorder and given a prescription for an antipsychotic 0-14 days after discharge comprised the study sample. (N=1973) | F3                 | LADB, Retrospective cohort               | To study the relationship between nonadherence to antipsychotic medication after hospital discharge and risk of rehospitalisation in patients who were previously hospitalized for treatment of bipolar disorder. | 5 and a half years | NA       | Compliance to treatment : Medication possession ratio (MPR); The MPR was calculated as the number of unique days any antipsychotic medication was prescribed to a patient during the 365 days after medication initiation divided by the total number of days in the post index period | Yes |
| Ilgem et al. 2008      | USA          | All patients with co-occurring substance                                                                                                                                                                       | No limitation      | Prospective cohort                       | The association between continuing outpatient care                                                                                                                                                                | 1 year             | 90 days  | Continuity of care: received continuing outpatient psychiatric care in the 30-day                                                                                                                                                                                                      | Yes |

|                           |           |                                                                                                                                                                               |               |                                          |                                                                                                                                                                                                              |           |           |                                                                                                                                                                                                                                                                         |     |
|---------------------------|-----------|-------------------------------------------------------------------------------------------------------------------------------------------------------------------------------|---------------|------------------------------------------|--------------------------------------------------------------------------------------------------------------------------------------------------------------------------------------------------------------|-----------|-----------|-------------------------------------------------------------------------------------------------------------------------------------------------------------------------------------------------------------------------------------------------------------------------|-----|
|                           |           | use and psychiatric disorders discharged from an inpatient psychiatric setting in the Department of Veterans Affairs (VA) between July 1, 2004, and June 30, 2005 (N=26,826). |               | LADB                                     | for a psychiatric disorder, a substance use disorder, or both and decreased risk of readmission to psychiatric care after an index episode of inpatient psychiatric treatment                                |           |           | period after discharge from the index episode and before any subsequent psychiatric rehospitalisation and the day on which this care occurred. This information was used to create a time-dependent indicator variable of psychiatric continuing care (coded no or yes) |     |
| Irmiter et al. 2009       | USA       | Individuals admitted to inpatient psychiatry (1982 to 1987) with at least one rehospitalisation within a 16-year period (N=1350)                                              | No limitation | Prospective cohort,                      | The focus of the study was on determining and comparing the characteristics and predictors of a SUD as comorbidity at index admission versus as post-discharge variable by comparison with those without SUD | 20 years  | 16 years  | Alcohol/Substance abuse : Diagnostic of a SUD at baseline vs. Post baseline                                                                                                                                                                                             | Yes |
| Irmiter et al. 2007       | USA       | Patients with SMI (schizophrenia, schizoaffective, or bipolar disorder) who were discharged in Fiscal Year 1998 (FY98) from VA inpatient psychiatric settings (N = 35,527).   | F2, F3        | Prospective cohort, Record linkage study | To evaluate prevalence rates, timing, and risk factors for re-institutionalization following psychiatric discharges among patients with SMI.                                                                 | 1 year    | 7 years   | Type of housing : Homelessness as a risk factor                                                                                                                                                                                                                         | Yes |
| Juven-Wetzler et al. 2012 | Israel    | All patients who were hospitalized three times or more during the past 12 months (N=35)                                                                                       | No limitation | Case control                             | To test the efficiency of continuation of care (COC) treatment by inpatient caregivers as compared to treatment administered by outpatient services for "revolving door" psychiatric patients                | 12 months | 18 months | Continuity of care : continuing follow-up in the ward, by the same staff, instead of being referred to the outpatient department                                                                                                                                        | Yes |
| Kent et al. 1994          | Australia | 50 patients with frequent readmissions to the South Australian Mental Health Services over 3 years                                                                            | No limitation | Descriptive                              | To identify factors that commonly contributed to the decision to re-hospitalize patients who made heavy use of mental health services.                                                                       | 1 year    | NA        | Type of housing : problems with accommodation                                                                                                                                                                                                                           | NA  |
| Kikuchi et al. 2013       | Japan     | All discharged psychiatric patients (N=200)                                                                                                                                   | F2            | Retrospective cohort                     | To evaluate the efficacy of a new continuous follow-up system (consisting in 4 3 monthly follow-up up                                                                                                        | 3 years   | 1 year    | Continuity of care : continuous follow-up at 3, 6, 9 and 12 months after discharge by phone or home visits                                                                                                                                                              | Yes |

|                      |         |                                                                                                                                                                                                  |               |                    |                                                                                                                                                                                                                                                                                                                    |         |         |                                                                                                                                                                                                                                                                                                                                                                                                                                                                                                                                                     |     |
|----------------------|---------|--------------------------------------------------------------------------------------------------------------------------------------------------------------------------------------------------|---------------|--------------------|--------------------------------------------------------------------------------------------------------------------------------------------------------------------------------------------------------------------------------------------------------------------------------------------------------------------|---------|---------|-----------------------------------------------------------------------------------------------------------------------------------------------------------------------------------------------------------------------------------------------------------------------------------------------------------------------------------------------------------------------------------------------------------------------------------------------------------------------------------------------------------------------------------------------------|-----|
|                      |         |                                                                                                                                                                                                  |               |                    | sessions either by telephone or by home visits)                                                                                                                                                                                                                                                                    |         |         |                                                                                                                                                                                                                                                                                                                                                                                                                                                                                                                                                     |     |
| Kim 2011             | USA     | Patients who had at least two inpatient psychiatric hospitalizations (case group, N=17,852) compared with matched patients not re hospitalized in the same period of time as the case (N=35,511) | F3            | LADB, case control | To assess whether increased frequency of clinical monitoring during the high-risk period of 12 weeks after discharge from a psychiatric hospitalization reduced subsequent rehospitalisation in a national cohort of Veterans Health Administration patients receiving depression treatment between 1999 and 2004. | 5 years | NA      | Continuity of care : Clinical monitoring; Monitoring intensity was expressed as a rate of visits (in person visits or visits by telephone) per 84 days                                                                                                                                                                                                                                                                                                                                                                                              | No  |
| Kolbasovsky 2009     | USA     | All eligible health plan members discharged from an acute inpatient hospitalization with a primary psychiatric diagnosis during a 1-year time period.                                            |               | Case control       | To determine the impact of ICM on 30-day inpatient psychiatric recidivism and associated costs among adult health plan members at elevated risk of psychiatric hospitalization                                                                                                                                     | 1 year  | 30 days | Case management: Intensive case management. ICM services are typically provided by a social worker, nurse, or other mental health clinician who maintains the primary responsibility of keeping in contact with the patient, assessing his or her needs, helping ensure that those needs are met, providing brokerage and advocacy, conducting activities of daily living skills training, and linking patients with educational and community resources.                                                                                           | Yes |
| Komatsu et al. 2013  | Japan   | Outpatients with schizophrenia                                                                                                                                                                   | F2            | RCT                | To evaluate the effectiveness of the ITAREPS excluding the effect of user adherence to the protocol of the program (N=45).                                                                                                                                                                                         | NA      | 12      | Relapse prevention program: Information Technology Aided Relapse Prevention Programme in Schizophrenia (ITAREPS). The ITAREPS presents a mobile phone-based telemedicine solution for weekly remote patient monitoring and disease management in schizophrenia and psychotic disorders in general. The program provides health professionals with home tele monitoring via a PC-to-phone short message service (SMS) platform that identifies prodromal symptoms of relapse, to enable early intervention and prevent unnecessary hospitalizations. | Yes |
| Korkeila et al. 1995 | Finland | All first-ever episodes of inpatient care, excluding psychotic                                                                                                                                   | No limitation | Prospective cohort | To study factors predicting readmissions and follow-up                                                                                                                                                                                                                                                             | 2 years | 5 years | Locus of care: The possible follow-up treatment setting was grouped as 1) specialized psychiatric treatment, 2)                                                                                                                                                                                                                                                                                                                                                                                                                                     | No  |

|                   |        |                                                                                                                                                                                                                                                                  |               |                          |                                                                                                                                                                                                                                                         |          |                     |                                                                                                                                  |     |
|-------------------|--------|------------------------------------------------------------------------------------------------------------------------------------------------------------------------------------------------------------------------------------------------------------------|---------------|--------------------------|---------------------------------------------------------------------------------------------------------------------------------------------------------------------------------------------------------------------------------------------------------|----------|---------------------|----------------------------------------------------------------------------------------------------------------------------------|-----|
|                   |        | and organic mental disorders, during a 2-yr period in a Finnish psychiatric clinic (N=64).                                                                                                                                                                       |               |                          | treatment of all first-ever episodes of inpatient care.                                                                                                                                                                                                 |          |                     | basic health care, 3) private therapist or psychiatrist or 4) polyclinic follow-up treatment by a nurse familiar to the patient. |     |
| Kuno et al. 1999  | USA    | Medicaid clients, ages 18 to 59, with a diagnosis of schizophrenia or chronic mood disorder, and a psychiatric hospitalization for at least 60 days within a year in community hospitals in Philadelphia between November 1, 1988 and December 31, 1991. (N=164) | F2, F3        | Case control             | To compare 2 types of case management: case management (CM) which provided the service coordination functions, and Intensive Case Management (ICM) which consisted of both the coordination function and the provision of direct support to the client. | 3 years  | 1 year              | Case management: Intensive Case Management (ICM) as compared with case management                                                | Yes |
| Loch 2012         | Brazil | One hundred-sixty-nine individuals with bipolar and psychotic disorder in need of hospitalization in the public mental health system.                                                                                                                            | F2, F3        | Prospective cohort       | To assess re-hospitalization rates of individuals with psychosis and bipolar disorder and to study determinants of readmission.                                                                                                                         | 4 months | 1, 2, 6, 12 months  | Visits to OP after index discharge : not attending outpatient consultations as a risk factor                                     | Yes |
| Mark et al. 2013  | USA    | 1375 individual records of patients with a baseline admission between 1982 and 1987 and re-hospitalized at least once over the next 16 years.                                                                                                                    | No limitation | Prospective Cohort, LADB | To provide data on readmissions for M/SUDs to inform debate over hospital readmission as an actionable quality performance indicator.                                                                                                                   | 6 years  | 30 days (days 8-30) | Receipt of medication : the percentage receiving a prescription fill for M/SUD,                                                  | Yes |
| Mesch et al. 1994 | Israel | First-time patients with schizophrenia admitted to a state mental hospital in Israel (494).                                                                                                                                                                      | F2            | Prospective cohort       | To examine the effects of living arrangements following 1st release, work placement after discharge, and length of hospitalization on the probability of readmission (RA) of 494 Ss (aged 22-54 years) admitted to a state mental hospital in Israel    | 2 years  | 5 years             | Type of housing : Living arrangements (family of orientation, family of procreation, living alone)                               | Yes |

|                           |     |                                                                                                                                                                                                                                          |               |                                          |                                                                                                                                                                                                                                                                       |         |                            |                                                                                                                                                                                                                       |     |
|---------------------------|-----|------------------------------------------------------------------------------------------------------------------------------------------------------------------------------------------------------------------------------------------|---------------|------------------------------------------|-----------------------------------------------------------------------------------------------------------------------------------------------------------------------------------------------------------------------------------------------------------------------|---------|----------------------------|-----------------------------------------------------------------------------------------------------------------------------------------------------------------------------------------------------------------------|-----|
| Moos et al. 1994          | USA | Inpatients with only an alcohol or drug dependence diagnosis (n = 11,652); inpatients with an alcohol or drug psychosis (n = 3,510); and inpatients with an alcohol or drug disorder and a concomitant psychiatric disorder (n = 5,977). | F1            | Prospective cohort, Record linkage study | To examine treatment utilization and 1-year re-admission rates among three diagnostic subgroups of late-middle-aged and older substance abuse inpatients in Department of Veterans Affairs (VA) Medical Centres.                                                      | 1 year  | 1 year                     | Visits to OP after index discharge: Whether patients obtained outpatient mental health or medical care during this interval, and, for those who did, the number of visits for each type of care.                      | No  |
| Moos et al. 1994          | USA | Late-middle-aged and older (age 55+) substance abuse inpatients (N = 16,066)                                                                                                                                                             | F1            | Prospective cohort, Record linkage study | To examine treatment, diagnoses and readmission among late-middle-aged and older (age 55+) substance abuse inpatients (N = 16,066) in Department of Veterans Affairs Medical Centres.                                                                                 | 1 year  | 4 years                    | Visits to OP after index discharge: Includes the percentage of patients who obtained outpatient mental health or medical care in the 4 years after the index episode, and the number of visits for each type of care. | Yes |
| Moos et al. 1995          | USA | 33,323 substance abuse patients discharged from 88 Department of Veterans Affairs (VA) substance abuse treatment programs in fiscal year 1991.                                                                                           | F1            | Prospective cohort, LADB                 | To explore the associations between specific program characteristics intended to foster patient improvement and case mix-adjusted rates of readmission for inpatient substance abuse or psychiatric care.                                                             | 1 year  | 1 year                     | Visits to OP after index discharge: post discharge outpatient mental health care was examined for the 1-month interval after the index episode of inpatient care                                                      | Yes |
| Morrow-Howell et al. 2006 | USA | 199 for older adults hospitalized for depression and discharged to the community.                                                                                                                                                        | F3            | Prospective cohort                       | To analyse factors associated with six-month post-acute dispositions (continuous community stay, medical hospitalization, psychiatric rehospitalisation, nursing home placement, death) for older adults hospitalized for depression and discharged to the community. | 2 years | 6 months                   | Compliance to treatment : Medical compliance as judged by family                                                                                                                                                      | Yes |
| Nelson et al. 2000        | USA | 3,113 patients discharged from inpatient psychiatric care in 1998                                                                                                                                                                        | No limitation | Prospective cohort                       | To examine whether patients discharged from inpatient psychiatric care would have lower rehospitalisation rates if they kept an outpatient follow-up appointment after discharge                                                                                      | 1 year  | 90, 180, 270, and 365 days | Compliance to appointments : complied with at least an appointments vs. Did not comply to any                                                                                                                         | Yes |

|                       |                                  |                                                                                                                   |               |                      |                                                                                                                                                                      |          |           |                                                                      |       |
|-----------------------|----------------------------------|-------------------------------------------------------------------------------------------------------------------|---------------|----------------------|----------------------------------------------------------------------------------------------------------------------------------------------------------------------|----------|-----------|----------------------------------------------------------------------|-------|
| Nielsen et al. 2008   | Denmark                          | 96 schizophrenic patients discharged                                                                              | F2            | Prospective cohort   | To investigate to which extent the GP is part of the follow-up treatment of schizophrenic patients after their discharge from a psychiatric department.              | 1 year   | 12 months | Follow up by GP : Contact with the GP after discharge                | Yes   |
| Niksalehi et al. 2011 | Iran                             | 62 patients with schizophrenia discharged from hospital                                                           | F2            | Experimental         | To compare the impact of two follow up methods in rate of rehospitalisation, length of hospitalization and mental condition of schizophrenics.                       | NA       | 4 months  | Home visits                                                          | Yes   |
| Oiesvold et al. 2000  | Norway, Sweden, Finland, Denmark | 837 consecutive 'new' patients admitted to psychiatric hospitals in four Nordic countries.                        | No limitation | Retrospective cohort | To identify predictors for readmission risk.                                                                                                                         | 1 year   | 1 year    | Visits to OP after index discharge : receipt of aftercare            | Yes   |
| Owen et al. 1997      | Australia                        | 128 inpatients (aged 16.7-80.6 years)                                                                             | No limitation | Prospective cohort   | To examine the relationship between rehospitalisation and the nature of psychiatric aftercare in a well-integrated hospital and community based psychiatric service. | 6 months | 6 months  | Follow up by GP : time in hours                                      | Yes   |
| Parker et al. 1995    | Australia                        | 118 subjects with an admission diagnosis of schizophrenia                                                         | F2            | Prospective cohort   | Test the capacity of Life Skills Profile (LSP) to predict hospital readmission in those with schizophrenia                                                           | 6 months | 1 year    | Type of housing : alone, with family/friends, Boarding house, hostel | Yes u |
| Pfeiffer et al. 2012  | USA                              | 56,785 Veterans Health Administration patients with an inpatient stay for major depression between 2005 and 2010. | F3            | Prospective cohort   | To assess whether timely post discharge follow-up, a health system quality indicator, corresponded with improved longer-term post hospital care for depression       | 5 years  | NA        | Follow-up within 7 days                                              | No    |
| Postrado et al. 1995  | USA                              | 559 patients with severe mental illness                                                                           | SMI           | Prospective cohort   | To examine whether rehospitalisation of patients with severe and persistent mental illness could be predicted by patients' quality of life.                          | 4 years  | 10 months | Quality of life : Satisfaction with family relations                 | Yes   |
| Priebe et al. 2009    | UK                               | 1570 consecutive patients between 18 and 65 years, , admitted under Sections 2, 3 and 4 of                        | No limitation | Prospective cohort   | To assess involuntary readmissions and patients' retrospective views of the justification of the admission as 1-year outcomes and to                                 | 2 years  | 1 year    | Type of housing : living alone vs living with others                 | Yes   |

|                               |         |                                                                                                           |               |                    |                                                                                                                                                                                                                                                                                  |                    |           |                                                                                                                                                                             |     |
|-------------------------------|---------|-----------------------------------------------------------------------------------------------------------|---------------|--------------------|----------------------------------------------------------------------------------------------------------------------------------------------------------------------------------------------------------------------------------------------------------------------------------|--------------------|-----------|-----------------------------------------------------------------------------------------------------------------------------------------------------------------------------|-----|
|                               |         | the Mental Health Act 1983                                                                                |               |                    | identify factors associated with these outcomes                                                                                                                                                                                                                                  |                    |           |                                                                                                                                                                             |     |
| Prince 2006                   | USA     | 264 persons with schizophrenia                                                                            | F2            | Prospective cohort | To examine the extent to which inpatient readmission among 264 persons with schizophrenia was averted by interventions addressing medication education, symptom education, service continuity, social skills, daily living, daily structure, and family issues.                  | 1 and a half years | 3 months  | Other interventions : interventions addressing medication education, symptom education, service continuity, social skills, daily living, daily structure, and family issues | Yes |
| Riordan et al. 2006           | UK      | 75 individuals conditionally discharged in the West Midlands between 1 April 1987 and 1 April 2000        | No limitation | Prospective cohort | To identify variables among a cohort of conditionally discharged patients in the West Midlands that would predict whether an individual was more likely to be readmitted to hospital, involved in a serious incident, to be recalled to hospital or given an absolute discharge. | 3 years            | 13 years  | Alcohol/Substance abuse                                                                                                                                                     | Yes |
| Rossler et al. 1992           | Germany | 162 patients dismissed from psychiatric hospitals                                                         | No limitation | Case control       | To estimate the effect of case management on the rehospitalization rate.                                                                                                                                                                                                         | 2.5 years          | 2.5 years | Case management                                                                                                                                                             | No  |
| Rossler et al. 1995           | Germany | 97 schizophrenic patients in the aftercare of case management services                                    | F2            |                    | To assess effectiveness of case management in reducing rehospitalization                                                                                                                                                                                                         | 2.5 years          | 2.5 years | Case management                                                                                                                                                             | No  |
| Schmidt-Kraepelin et al. 2009 | Germany | 46 "high utilizing" patients with Schizophrenia                                                           | F2            | Case control       | To test whether patients who receive guideline-adherent complex interventions are less likely to be readmitted                                                                                                                                                                   | 6 months           | 12 months | Relapse prevention program                                                                                                                                                  | Yes |
| Schoenbaum et al. 1995        | USA     | 580 psychiatric inpatients discharged from treatment in 2 divisions of a health maintenance organization. | No limitation | Prospective cohort | Examined the relationship between follow-up and rehospitalisation                                                                                                                                                                                                                | 1 year             | 1 year    | Follow-up within 30 days                                                                                                                                                    | Yes |
| Sharifi et al. 2012           | Iran    | 130 patients with schizophrenia, schizoaffective disorder or bipolar disorder                             | F2, F3        | RCT                | To examine the effectiveness of a low-intensity home-based aftercare service                                                                                                                                                                                                     | NA                 | 1 year    | Home visits                                                                                                                                                                 | Yes |

|                      |        |                                                                                                                                                                                                               |               |                    |                                                                                                                                                                                                                                                 |           |          |                                                                                                                                                                                                                                                                                                                                                                                                                                                                                         |     |
|----------------------|--------|---------------------------------------------------------------------------------------------------------------------------------------------------------------------------------------------------------------|---------------|--------------------|-------------------------------------------------------------------------------------------------------------------------------------------------------------------------------------------------------------------------------------------------|-----------|----------|-----------------------------------------------------------------------------------------------------------------------------------------------------------------------------------------------------------------------------------------------------------------------------------------------------------------------------------------------------------------------------------------------------------------------------------------------------------------------------------------|-----|
| Silva et al. 2009    | Brazil | 307 adults admitted to either of two public psychiatric hospitals in southern Brazil during a 12-month period and who had three or more psychiatric admissions in the two years before the current admission. | No limitation | Case control       | To explore factors associated with multiple psychiatric admissions.                                                                                                                                                                             | 1 year    | NA       | Follow up by GP : Registered with a primary care unit                                                                                                                                                                                                                                                                                                                                                                                                                                   | No  |
| Sledge et al. 2011   | USA    | 74 patients were 18 years or older with major mental illness and had been hospitalized three or more times in the prior 18 months (36 TAU, 36 TAU plus peer mentor)                                           | F2, F3        | RCT                | To examine the feasibility and effectiveness of using peer support to reduce recurrent psychiatric hospitalizations.                                                                                                                            | 2 years   | 9 months | Peer support                                                                                                                                                                                                                                                                                                                                                                                                                                                                            | Yes |
| Stahler et al. 2009  | USA    | 380 patients who were dually diagnosed with at least one mental disorder and a substance use disorder and discharged from an acute psychiatric inpatient care unit.                                           | No limitation | Prospective cohort | To analyse neighbourhood and individual factors predicting initial outpatient treatment attendance and rehospitalization within 1 year among patients who were dually diagnosed with at least one mental disorder and a substance use disorder. | 14 months | 1 year   | Geographical variables                                                                                                                                                                                                                                                                                                                                                                                                                                                                  | Yes |
| Sullivan et al. 1997 | USA    | Individuals with schizophrenia at increased risk for rehospitalization (101 recidivists (cases) matched to 101 non recidivists (controls))                                                                    | F2            | Case control       | Investigated the extent to which aberrant behaviours place individuals with schizophrenia at increased risk for rehospitalization.                                                                                                              | 3 months  | NA       | Behaviour : (1) refusing to eat, (2) not keeping self-clean or well-groomed, (3) isolating self, (4) wandering away from home or getting lost, (5) talking to people who weren't really there, (6) having a temper tantrum, (7) doing strange or bizarre things, such as dressing inappropriately, (8) acting like others were after him/her or plotting against him/her, (9) verbally or physically threatening or attacking others, and (10) talking about or attempting to harm self | Yes |
| Sullivan et al. 1995 | USA    | 101 recently readmitted psychiatric Ss (with a primary                                                                                                                                                        | F2            | Case control       | To identify risk factors for rehospitalization in a seriously mentally ill                                                                                                                                                                      | 3 month   | NA       | Type of housing : Not living with family                                                                                                                                                                                                                                                                                                                                                                                                                                                | Yes |

|                      |                        |                                                                                                                                                            |               |                                          |                                                                                                                                                                                                                                            |           |           |                                                                                                                                                                       |      |
|----------------------|------------------------|------------------------------------------------------------------------------------------------------------------------------------------------------------|---------------|------------------------------------------|--------------------------------------------------------------------------------------------------------------------------------------------------------------------------------------------------------------------------------------------|-----------|-----------|-----------------------------------------------------------------------------------------------------------------------------------------------------------------------|------|
|                      |                        | diagnosis of schizophrenia) were compared with 101 previously hospitalized community-dwelling controls                                                     |               |                                          | population, focusing on factors that have the potential to be modified through community-based interventions.                                                                                                                              |           |           |                                                                                                                                                                       |      |
| Suzuki et al. 2003   | Japan                  | 67 hospitalized patients vs controls selected from the outpatients who were matched by age, gender, and the period after the last discharge (n = 62).      | F2            | Case control                             | To identify the associated factors of rehospitalization in schizophrenic patient.                                                                                                                                                          | 4 months  | NA        | Compliance to treatment : medication compliance                                                                                                                       | Yes  |
| Swartz et al. 2001   | USA                    | 331 involuntarily hospitalized patients awaiting discharge under OC                                                                                        | F2, F3        | RCT                                      | To provide empirical data on involuntary outpatient commitment and to evaluate its effectiveness in improving outcomes among persons with severe mental illnesses.                                                                         | 3 years   | 12 months | Community treatment orders (CTO) : outpatient commitment (OC)                                                                                                         | Yes  |
| Swindle et al. 1995  | USA                    | 7,711 inpatients with both substance abuse and major psychiatric disorders.                                                                                | No limitation | Prospective cohort, Record linkage study | To examine the patient case mix and program determinants of 6-month readmission rates and early treatment dropout for 7,711 VA inpatients with both substance abuse and major psychiatric disorders. .                                     | 1 year    | 180 days  | Follow-up within 30 days : receiving two or more psychiatric aftercare visits within 30 days of discharge                                                             | Yes  |
| Sytema et al. 1999   | Australia, Netherlands | Patients with schizophrenia and related disorders                                                                                                          | F2            | Prospective cohort, Record linkage study | To compare service consumption, continuity of care and risk of readmission in a record linkage follow-up study of cohorts of patients with schizophrenia and related disorders in Victoria (Australia) and in Groningen (The Netherlands). | 1 year    | 4 years   | Visits to OP after index discharge : Out-patient contacts                                                                                                             | No   |
| Thompson et al. 2003 | USA                    | 1,481 patients (with a diagnosis of either a schizophrenic disorder, excluding schizophreniform disorder, or a mood disorder, excluding dysthymia) who had | F2, F3        | Prospective cohort                       | To explore the interrelationship among aftercare, length of hospital stay, and rehospitalisation within six months of discharge in a sample of psychiatric inpatients.                                                                     | 2.5 years | 6 months  | Aftercare: aftercare was defined as referral to a psychiatric aftercare program, such as outpatient care, foster care, or a group home, not including a nursing home. | Yes. |

|                          |           |                                                                                                                                                                                                                      |               |                                          |                                                                                                                                                                    |           |                                  |                                                                                                                                                             |     |
|--------------------------|-----------|----------------------------------------------------------------------------------------------------------------------------------------------------------------------------------------------------------------------|---------------|------------------------------------------|--------------------------------------------------------------------------------------------------------------------------------------------------------------------|-----------|----------------------------------|-------------------------------------------------------------------------------------------------------------------------------------------------------------|-----|
|                          |           | received inpatient care at a state psychiatric hospital from November 1991 to July 1994.                                                                                                                             |               |                                          |                                                                                                                                                                    |           |                                  |                                                                                                                                                             |     |
| Thornicroft et al. 1992  | UK        | 357 psychiatric patients who had been in hospital for over one year, of whom 118 were "new" long stay and 239 "old" long stay patients                                                                               | No limitation | Prospective cohort                       | O identify risk factors which increase the likelihood of readmission for long stay psychiatric patients after discharge from hospital.                             | 5 years   | 5 years                          | Type of housing : living in a staffed vs in a non-staffed group home                                                                                        | Yes |
| Touch Mercer et al. 1999 | USA       | 150 male, geropsychiatric inpatients (aged 59-88 years).                                                                                                                                                             | No limitation | Prospective cohort                       | To identify risk factors for geropsychiatric rehospitalisation.                                                                                                    | 2.5 years | 1.5 year                         | Type of housing : Living at discharge (%): Home alone, Home with supervision, Personal care home, Long-term care                                            | No  |
| Vaughan et al. 2000      | Australia | All patients (diagnosed with schizophrenia, schizophreniform disorder or schizoaffective disorder, or atypical psychosis) given CTOs (N=123) within a 4-yr period and a matched comparison group of patients (N=123) | F2            | Case control                             | Investigated the readmission rate and the level of patient disturbance and community care associated with readmission following Community Treatment Orders (CTOs). | 4 years   | Variable (range = 12-60 months). | Community treatment orders (CTO)                                                                                                                            | Yes |
| Walker et al. 1996       | USA       | 423 adult patients admitted to a voluntary psychiatric unit within a tertiary care general hospital in a rural section of North Carolina                                                                             | No limitation | Prospective cohort                       | To identify risk factors associated with psychiatric rehospitalisation within six months,                                                                          | 1 year    | 6 months                         | Type of housing                                                                                                                                             | Yes |
| Warren et al. 1994       | Australia | 133 people discharged from a public, rural, psychiatric hospital with diagnoses of mental illness.                                                                                                                   | No limitation | Prospective cohort                       | To test whether effective follow-up reduces readmission rates                                                                                                      | 3 years   | 1 year                           | Aftercare : 4 principles for effective follow up: focus on acute stress, medication strategy; goal oriented focus on chronic stress, ongoing and systematic | Yes |
| Yamada et al. 2000       | USA       | 163 SMI patients (schizophrenia, major depression, manic                                                                                                                                                             | F2, F3        | Prospective cohort, Record linkage study | To examine length of stay in the community of patients with SPMI and identify predictor variables.                                                                 | NA        | 4 years                          | Type of housing : Patents home, boarding home, nursing home                                                                                                 | Yes |

|                    |           |                                                                                                                                                                                                                  |               |                    |                                                                                                                                                                                               |          |          |                                                                                                                                  |     |
|--------------------|-----------|------------------------------------------------------------------------------------------------------------------------------------------------------------------------------------------------------------------|---------------|--------------------|-----------------------------------------------------------------------------------------------------------------------------------------------------------------------------------------------|----------|----------|----------------------------------------------------------------------------------------------------------------------------------|-----|
|                    |           | depressive disorder or other severe illness)                                                                                                                                                                     |               |                    |                                                                                                                                                                                               |          |          |                                                                                                                                  |     |
| Yeaman et al. 2003 | USA       | 110 people who were discharged from a state hospital during a 24-month period who met criteria for recidivism, 51 individuals who were lost to follow-up, and 106 peers selected randomly as a comparison group. | F2, F3, F6    | Case control       | To examine three sets of hypothetical variables- demographic, diagnostic, and service-that may explain recidivism and/or lost-to-follow-up in people recently discharged from inpatient care. | 2 years  | NA       | Contact in the community on the day of discharge : whether a community based follow-up was provided within 24 hours of discharge | No  |
| Zeff et al. 1990   | USA       | 246 active duty patients                                                                                                                                                                                         | No limitation | Prospective cohort | To identify factors related to the readmission of patients in the military.                                                                                                                   | 6 months | 3 months | Aftercare : Aftercare provider: psychiatrist vs non-psychiatrist                                                                 | No  |
| Zhang et al 2011   | Australia | 178 patients discharged from an acute unit                                                                                                                                                                       | F2            | Prospective cohort | To investigate predictors for the risk of readmission at an acute psychiatric inpatient unit.                                                                                                 | 1 year   | 1 year   | Community treatment orders (CTO)                                                                                                 | Yes |
